# Supplementary material
Source: PubMed Central journal article supplement (PMC7205424)
Supplement: jciinsight-5-129905-s187.pdf [file jciinsight-5-129905-s187.pdf]

**Supplemental Table 1.** Calculated IC<sub>50</sub> doses and combination index (CI) values for constant ratio dose combinations of FOLFOX and JNK-IN-8 in four PDAC cell lines as determined by CompuSyn software (45) (n=3).

| Cell line  | Drug/Combo    | Calculated IC50 (µM) | CI at 1 µM | CI at 10 µM |
|------------|---------------|----------------------|------------|-------------|
| P411-T1    | JNK-IN-8      | 58.9                 | -          | -           |
|            | FOLFOX        | 61.9                 | -          | -           |
|            | COMBO 10:1:5  | 5.79                 | 0.41       | 0.070       |
|            | COMBO 10:1:10 | 5.25                 | 0.13       | 0.074       |
| CFPAC-1    | JNK-IN-8      | 47.7                 | -          | -           |
|            | FOLFOX        | 13.7                 | -          | -           |
|            | COMBO 10:1:5  | 2.30                 | 0.077      | 0.043       |
|            | COMBO 10:1:10 | 2.25                 | 0.038      | 0.031       |
| P422-T1    | JNK-IN-8      | 111                  | -          | -           |
|            | FOLFOX        | 31800                | -          | -           |
|            | COMBO 10:1:5  | 17.4                 | 0.037      | 0.085       |
|            | COMBO 10:1:10 | 16.2                 | 0.046      | 0.15        |
| MIA PaCa-2 | JNK-IN-8      | 8.06                 | -          | -           |
|            | FOLFOX        | 10.7                 | -          | -           |
|            | COMBO 10:1:5  | 18.0                 | 7.9        | 0.47        |
|            | COMBO 10:1:10 | 7.42                 | 6.2        | 0.12        |

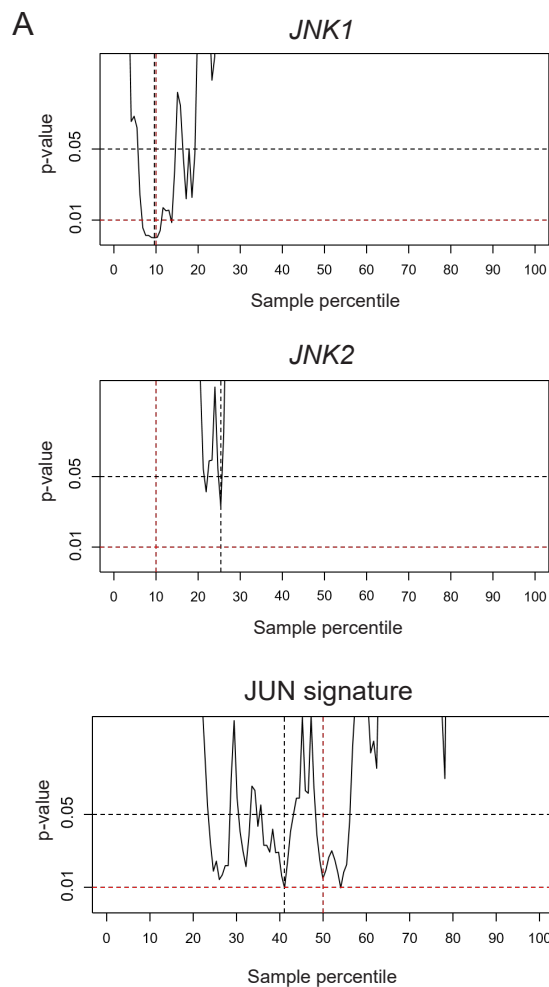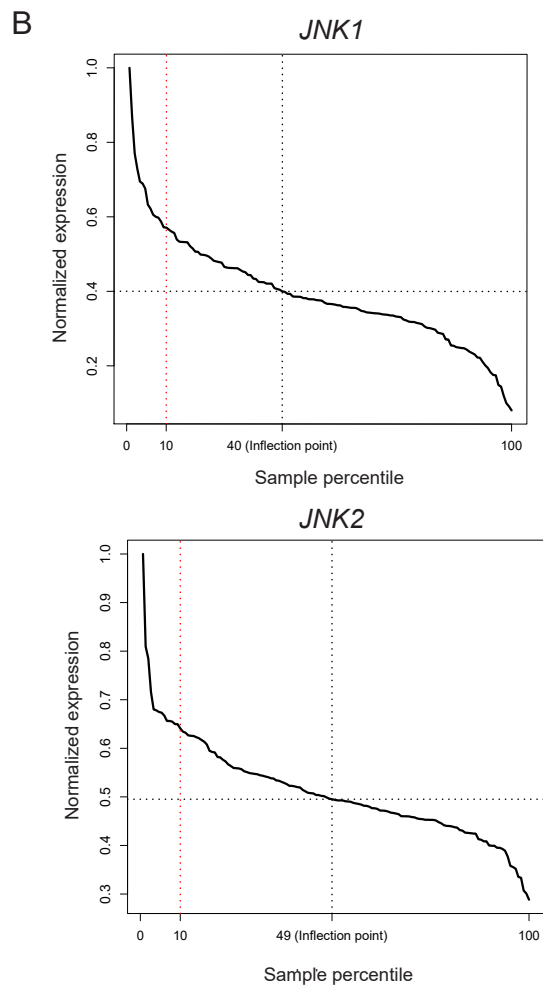

**Supplemental Figure 1. p-value profiles and expression distributions for survival analyses.** (A) p-value profiles for survival analyses for *JNK1* (top), *JNK2* (middle), and the JUN signature (bottom) as described for Figure 2. Samples were ordered by expression (*JNK1* or *JNK2*) or by mean ranked expression (JUN signature). Survival analysis for each possible binary classification of samples into high and low expressing groups and associated p-values were plotted. Horizontal dashed lines show p-values of 0.01 and 0.05. Vertical dashed lines show the minimum p-value sample cut-off as well as the top 10% (*JNK1* and *JNK2*) or median expression (JUN signature). (B) Normalized expression distribution for *JNK1* (top) and *JNK2* (bottom). Dotted vertical lines show potential cut-offs at the 10th percentile and at the geometric inflection point for each expression curve.

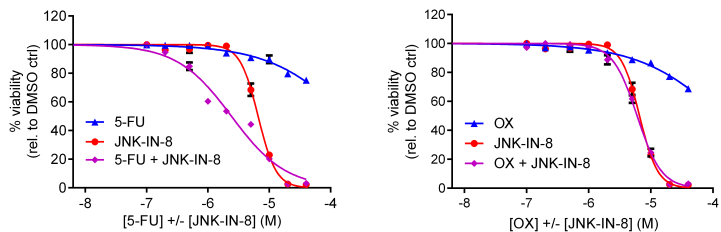

**Supplemental Figure 2. Dose-response data for JNK-IN-8 with 5-FU (left) or OX (right) in P411-T1 PDX-CL.** Dose-response curves for JNK-IN-8 (red), 5-FU or OX alone (blue), and constant ratio combinations (purple), shown as mean $\pm$ SEM normalized % viability (n=2).



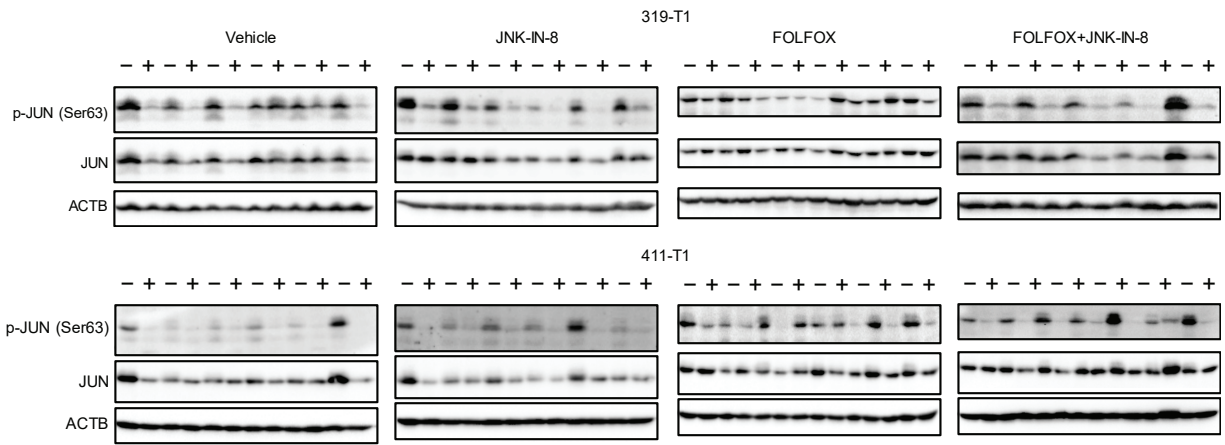

**Supplemental Figure 4. Immunoblot images from in vivo tumor studies.** (A) Immunoblots in matched 319-T1 (top) and 411-T1 (bottom) PDX tumors before (-) and after (+) respective 28 d treatments. All tumors were harvested 4 h after final treatment. ACTB used as loading control.

A

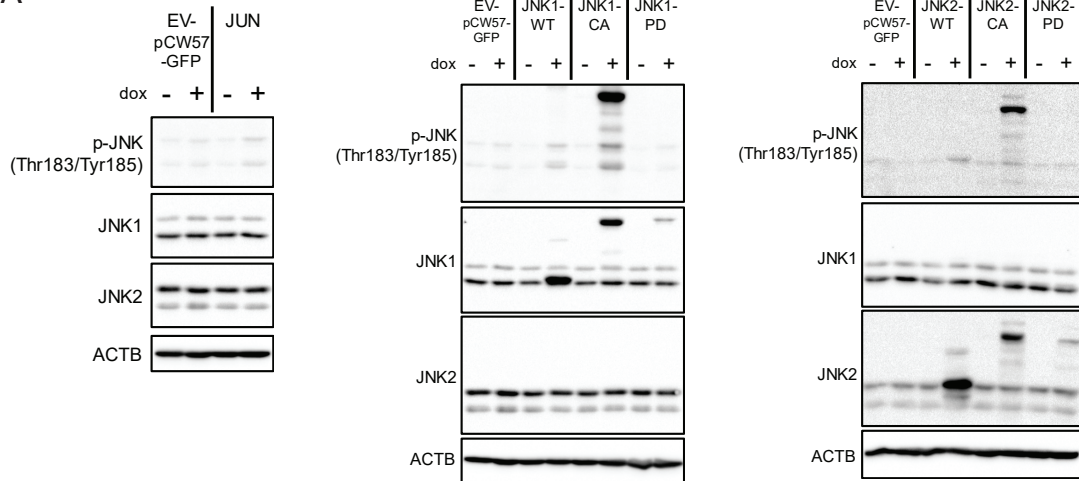

B

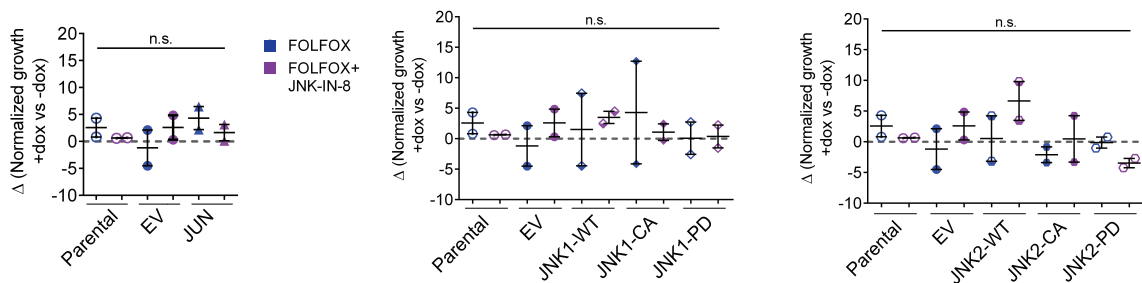

**Supplemental Figure 5. Additional data for cell lines with dox inducible expression of JUN, JNK1, and JNK2.** (A) Immunoblots after inducible expression of JUN (left), JNK1 (middle), and JNK2 (right) in lentiviral-infected CFPAC-1 cells. ACTB used as loading control. (B) Effects of overexpression on sensitivity to FOLFOX and FOLFOX+JNK-IN-8 in MIA PaCa-2 cells overexpressing JUN (left), JNK1 (middle), and JNK2 (right) transgenes (n=2).
